1 A human factor H-binding protein of *Bartonella bacilliformis* and potential  
2 role in serum resistance

3 **Linda D. Hicks, Shaun Wachter, Benjamin J. Mason, Pablo Marin Garrido, Mason**  
4 **Derendinger, Kyle Shifflett, Michael F. Minnick\***

5 Program in Cellular, Molecular & Microbial Biology, Division of Biological Sciences, University of  
6 Montana, Missoula, Montana, United States of America

7

8 \*Corresponding author

9 E-mail: [mike.minnick@mso.umt.edu](mailto:mike.minnick@mso.umt.edu) (MM)

10

11 **Keywords-** complement, serum resistance, *Bartonella*, factor H, Carrión's disease

12 **Running title-** Factor H-binding protein of *Bartonella bacilliformis*

13

## 14 **Abstract**

15 *Bartonella bacilliformis* is a Gram-negative bacterium and etiologic agent of Carrión's disease; a  
16 potentially life-threatening illness endemic to South America. *B. bacilliformis* is a facultative  
17 parasite that infects human erythrocytes (hemotrophism) and the circulatory system, culminating  
18 in a variety of symptoms, including a precipitous drop in hematocrit, angiomatous lesions of the  
19 skin (verruca peruana) and persistent bacteremia. Because of its specialized niche, serum  
20 complement imposes a continual selective pressure on the pathogen. In this study, we  
21 demonstrated the marked serum-resistance phenotype of *B. bacilliformis*, the role of factor H in  
22 serum complement resistance, and binding of host factor H to four membrane-associated  
23 polypeptides of ~131, 119, 60 and 43 kDa by far-western (FW) blots. The ~119-kDa protein was  
24 identified as ABM44634.1 by mass spectrometry; a protein annotated as a 116.5-kDa outer  
25 membrane autotransporter (encoded by the BARBAKC583\_1133 locus). We designated the  
26 protein as factor H-binding protein A (FhbpA). FhbpA possesses three structural motifs common  
27 to all autotransporter proteins (i.e., a signal peptide, autotransporter  $\beta$ -barrel domain and  
28 passenger domain). Recombinant FhbpA passenger domain, but not the recombinant  
29 autotransporter domain, was able to bind human factor H when analyzed by FW blots.  
30 Phylogenetic analyses of the passenger domain suggest that it is well-conserved among  
31 *Bartonella* autotransporters, with closest matches from *Bartonella schoenbuchensis*.  
32 Transcriptomic analyses of *B. bacilliformis* subjected to conditions mimicking the sand fly vector  
33 or human host, and infection of human blood or vascular endothelial cells showed maximal  
34 expression of *fhbpA* under human-like conditions and during infection of blood and endothelial  
35 cells. Expression during HUVEC infection was significantly higher compared to all other  
36 conditions by DESeq2. Surface binding of serum factor H by FhbpA is hypothesized to play a  
37 protective role against the alternative pathway of complement fixation during *B. bacilliformis*  
38 infection of the human host.

## 39 **Author Summary**

40 *B. bacilliformis* is a bacterial pathogen that colonizes the circulatory system of humans, where it  
41 can cause a life-threatening illness unless treated. Serum complement is a major effector of  
42 innate humoral immunity and a significant obstacle that must be evaded for successful survival  
43 and colonization by pathogens, especially those residing in the vasculature. In this study, we  
44 examined the serum complement resistance phenotype of *B. bacilliformis* and identified four  
45 membrane-associated proteins that bind serum factor H; a protein used by the host to protect its  
46 own tissues from complement activation. One of the proteins was identified by mass  
47 spectrometry, characterized, and designated factor H-binding protein A (FhbpA). FhbpA is a  
48 predicted autotransporter, and we determined that the translocated “passenger” domain of the  
49 protein is responsible for binding factor H. We also determined that expression of the *fhbpA*  
50 gene was highest during infection of human blood and especially vascular endothelial cells or  
51 under conditions that simulate the human host. The results suggest that FhbpA binding of host  
52 serum factor H protects the bacterium against complement activation during infection.

## 53 **Introduction**

54 *Bartonella* are arthropod-transmitted, Gram-negative bacteria that parasitize the circulatory  
55 system of mammals, spanning the gamut of rodents to cetaceans. Three pathogenic species  
56 cause most infections of humans, including *Bartonella bacilliformis*, *Bartonella quintana* and  
57 *Bartonella henselae*; the agents of Carrion’s disease, trench fever, and cat-scratch disease,  
58 respectively. Bartonelloses present with a wide range of symptoms and syndromes, such as  
59 chronic asymptomatic bacteremia, malaise, fever, myalgia, bacillary angiomatosis, bacillary  
60 peliosis, infectious endocarditis and hemolytic anemia. Nevertheless, conserved attributes of  
61 *Bartonella*’s pathogenesis form a foundation for these various manifestations. First, all  
62 bartonellae are hemotrophic; i.e., they infect erythrocytes, presumably to fulfill their

63 extraordinary requirement for heme [1]. Hemotrophy is a highly unusual parasitic strategy for  
64 bacteria, and it contributes to the severe hemolytic anemia during the acute (hematic) phase of  
65 Carrión's disease and the persistent bacteremia common to all types of bartonellosis [1].  
66 Second, *Bartonella's* infection of vascular endothelial cells can provoke pathological  
67 angiogenesis in humans, culminating in bacillary angiomatosis (*B. quintana* or *B. henselae*),  
68 verruga peruana (*B. bacilliformis*), or bacillary peliosis of the liver or spleen (*B. henselae*) [1].

69 The complement system of vertebrates consists of over thirty proteins synthesized by the  
70 liver and released into serum, where they influence both cellular and inflammatory processes in  
71 the humoral immune compartment. Complement activities include opsonization (by C3b),  
72 activating the discharge of pre-formed inflammatory mediators of granulocytes such as  
73 histamine release during mast cell degranulation (by the anaphylatoxins C3a, C4a, C5a),  
74 leukocyte chemotaxis and recruitment to an area of microbial challenge (by C5a), and lysis of  
75 invading microbes (by the membrane attack complex, C5bC6C7C8C9). Complement activation  
76 proceeds by cascade-mediated processes initiated by: 1) IgG or IgM binding to an antigen  
77 (classical pathway), 2) C3b factor binding to an activator surface such as peptidoglycan or LPS  
78 (alternative pathway), and 3) binding of mannose-binding lectin (MBL) to a surface containing  
79 mannose (lectin pathway). While the classical pathway is initiated by IgG or IgM immunoglobulin  
80 binding to an antigen and therefore dovetails with the adaptive immune response, the  
81 alternative and lectin pathways are entirely innate forms of immunity and provide a first line of  
82 defense against microbial challenge.

83 Many bacterial pathogens of vertebrates have evolved mechanisms that confer resistance to  
84 serum complement in order to colonize the host. Serum resistance in bacteria is conferred by  
85 various molecular means, including capsular polysaccharides and lipopolysaccharide [2, 3],  
86 utilization of surface receptors that bind host serum factor H to accelerate the decay of C3  
87 convertase (C3bBb), inactivation of C3b in collaboration with factor I of the alternative pathway

88 [4, 5], prevention of IgM binding to inhibit activation of the classical pathway [6], binding of host  
89 C1 esterase inhibitor [7], and binding of the C4b-binding protein inhibitor of classical and lectin  
90 pathways [8]. In the present study, we describe a human serum factor H-binding protein of *B.*  
91 *bacilliformis* that is annotated as an autotransporter (ABM44634.1). To our knowledge, this is  
92 the first report describing a potential complement-resistance factor of *B. bacilliformis*.

## 93 **Materials and methods**

### 94 **Ethics statement**

95 The Institutional Biosafety Committee and Institutional Review Board at the University of  
96 Montana granted approval for experimental use of human blood (IBC 2019-05; IRB 120-20).  
97 Formal consent was obtained in verbal form from the blood donor (co-author MM).

### 98 **Bacterial strains and cultures**

99 *B. bacilliformis* type strain KC583 (ATCC 35685; American Type Culture Collection; Manassas,  
100 VA) was used in all experiments. Cultivation of the bacterium was limited to six passages  
101 beyond the ATCC stock. Cultures were grown 4 d (approx. mid-log phase) at 30°C and 100%  
102 relative humidity on agar plates consisting of a heart infusion broth base (HIB; Becton  
103 Dickinson; Franklin Lakes, NJ) supplemented with 4% sheep erythrocytes and 2% filter-sterile  
104 sheep serum by volume (HIBB medium). Sheep erythrocytes and sera were purchased from  
105 Quad Five; Ryegate, MT. *Escherichia coli* strains (**Table S1**) were grown in lysogeny broth (LB)  
106 or LB agar plates for 16 h at 37°C. Antibiotic supplements were added to media as needed for  
107 selection (e.g., kanamycin 50 µg/ml, ampicillin 100 µg/ml).

### 108 **Serum resistance assays**

109 For serum resistance assays, four 4-d-old *B. bacilliformis* cultures were harvested from HIBB  
110 plates into HIB at 25°C. The cell suspension was gently vortexed, centrifuged for 1 min at  
111 16,100 x g and the supernatant discarded. The remaining pellet was gently and thoroughly

112 resuspended into 1 ml HIB. From this suspension, 100  $\mu$ l aliquots (in duplicate) were removed  
113 and added to: 1) pooled human serum complement (HSC; Innovative Research; Novi, MI) in  
114 HIB to give a 50% serum concentration, 2) pooled human serum complement inactivated by  
115 treating for 30 min at 56°C then diluted in HIB to give a 50% concentration (iHSC), or 3) human  
116 factor H-depleted serum (FHDS; Complement Technology; Tyler, TX) diluted in HIB to give a  
117 50% concentration. The resulting cell mixtures were incubated for 1h at 30°C with gentle  
118 vortexing by hand at 5-min intervals. Following incubation, the mixtures were placed on ice and  
119 immediately ten-fold serially diluted to 10<sup>-6</sup> in ice-cold HIB. Aliquots of the dilutions (100  $\mu$ l) were  
120 plated onto HIBB in duplicate and incubated for 7d at 30°C. Average CFU's were determined by  
121 manual colony counting.

## 122 **Sodium dodecyl sulfate-polyacrylamide gel electrophoresis (SDS-PAGE) and far-western** 123 **(FW) blots**

124 Whole-cell lysates of *B. bacilliformis* were prepared by harvesting 4-d-old cultures on HIBB  
125 plates into ice-cold HIB. The cell suspension was centrifuged for 5 min (6000 x g, 4°C) and the  
126 pellet resuspended in 1 ml cold PBS (pH 7.4). After re-centrifuging, the final pellet was  
127 suspended in 1 ml PBS and frozen (-80°C) until used. Total membranes of *B. bacilliformis* were  
128 prepared as we previously described [9]. Protein concentrations were determined using a Pierce  
129 BCA Protein Assay kit as instructed by the manufacturer (Thermo Fisher; Waltham, MA).  
130 Protein profiles were analyzed by SDS-PAGE using pre-cast 4-20% acrylamide gradient gels  
131 (Novex WedgeWell, Tris-glycine gel; Thermo Fisher) and 20  $\mu$ g protein per well. Samples were  
132 solubilized in Laemmli 6X sample buffer, boiled 10 min and centrifuged 1 min (16,100 x g, 25°C)  
133 prior to loading the resulting supernatants onto gels. Protein banding patterns were visualized  
134 by staining gels with Coomassie brilliant blue R.

135 Far-western (FW) blots were prepared by transferring proteins from un-fixed / unstained  
136 SDS-PAGE gels to supported nitrocellulose [0.45  $\mu$ m pore; Cytiva, Marlborough, MA] [10],

137 immediately following electrophoresis. FW blots were blocked overnight in PBS-T.3 [PBS (pH  
138 7.4) and 0.3% Tween-20] containing 5% (w/v) non-fat dry milk. Blots were then probed for 60  
139 min with human complement factor H (Complement Technology) at 5 ng/ $\mu$ l in PBS-T.3, followed  
140 by a 60-min incubation with mouse anti-human factor H antibodies (MilliporeSigma, St. Louis,  
141 MO) diluted 1:1000. After three 5-min washes in PBS-T.3, blots were re-probed with rabbit anti-  
142 mouse IgG peroxidase-conjugated antibodies (Bio-Rad / AbD Serotec; Hercules, CA) diluted  
143 1:40,000 in PBS-T.3. Blots were then washed three times for 5 min in PBS-T.3 and developed  
144 with ECL reagents per manufacturer instructions (SuperSignal West Pico Chemiluminescent  
145 Substrate; Thermo Fisher). FW blots were visualized with a LAS-3000 digital imaging system  
146 (Fujifilm; Valhalla, NY).

#### 147 **Mass spectrometry**

148 Membrane-associated proteins of *B. bacilliformis* were prepared, separated by SDS-PAGE (20  
149  $\mu$ g protein per lane) and the resulting gels stained with Coomassie brilliant blue R, as above.  
150 Protein bands of interest were excised from gels and submitted to Alphalyse Laboratories (Palo  
151 Alto, CA), for mass spectrometry (MS). Briefly, samples were reduced and alkylated, then  
152 digested with trypsin. The resulting peptides were evaluated by matrix-assisted laser desorption  
153 / ionization tandem time-of-flight (MALDI-TOF/TOF) MS. For peptide fragmentation analysis  
154 (partial sequencing), MALDI MS/MS was employed. Database searches were done using the  
155 MS and MS/MS data and Mascot 2.4 software (Matrix Science; Boston, MA).

#### 156 **Immunofluorescence analysis and UV microscopy**

157 *B. bacilliformis* was grown 4 d on four HIBB plates and harvested into 2 ml HIB at 25°C. Cells  
158 were centrifuged for 5 min (6,000 x g, 25°C). The resulting pellet was washed 3 times in 2 ml  
159 PBS (pH 7.4, 25°C), with gentle vortexing and centrifugations, as above, after each wash. The  
160 final pellet was resuspended in 2 ml of 2% paraformaldehyde (in PBS) and incubated 45 min at  
161 25°C to fix the cells. Fixing was quenched with 2 ml 0.1 M glycine (in PBS). Fixed bacteria were

162 pelleted by centrifugation and washed 3 times with PBS containing 0.05% Tween-20 (PBS-  
163 T.05), as above. To block non-specific antibody binding, cells were resuspended in PBS  
164 containing 0.05% Tween 20 and 5% (v/v) donkey serum (PBS-TDS) and incubated 60 min at  
165 25°C with rocking. This mixture was re-centrifuged, the pellet resuspended in 250 µl pooled  
166 HSC (Innovative Research) and then incubated for 30 min. Cells were then washed three times  
167 in PBS-TDS with centrifugations, as above, after each wash. The final pellet was resuspended  
168 in PBS-TDS and divided into 3 aliquots of equal volume in microcentrifuge tubes. Tubes were  
169 centrifuged and the pellets resuspended in: a) goat anti-human factor H antiserum (Complement  
170 Technology), b) PBS or c) pooled goat normal serum (Quad Five) diluted in PBS-TDS (1:100).  
171 Mixtures were incubated for 60 min at 25°C with gentle rocking, then re-centrifuged. Resulting  
172 pellets were washed 3 times with PBS-TDS with centrifugations between washes. The final  
173 pellets were resuspended in AlexaFluor 488 donkey anti-goat IgG (Thermo Fisher) diluted 1:100  
174 in PBS-TDS, and incubated for 60 min at 25°C with gentle rocking. The cells were then washed  
175 3 times in PBS-TDS with centrifugations after each wash, as above. The final pellet was  
176 resuspended in PBS-T.05, and wet mounts were prepared and observed with an Olympus BX51  
177 phase contrast microscope equipped with a fluorescence illuminator (X-Cite 120Q; Excelitas  
178 Technologies; Waltham, MA), DP72 camera (Olympus; Center Valley, PA) and DP2-BSW  
179 acquisition software (Olympus).

### 180 **Cloning and expression of *fhbpA***

181 The Gateway system (Thermo Fisher) was used to clone predicted autotransporter and  
182 passenger domains of FhbpA (ABM44634.1). Briefly, synthetic oligonucleotides corresponding  
183 to 5' and 3' ends of the coding sequences for the domains (see **S1 Table** for details) were used  
184 to amplify respective targets by standard PCR. The PCR products were cloned into an entry  
185 vector using a pENTR/D-TOPO Cloning Kit, then transformed into *E. coli* (Top10) as instructed  
186 by the manufacturer (Thermo Fisher). Positive colonies were identified by PCR screening with

187 the same primers used in cloning. Plasmids were purified from positive clones with a QIAprep  
188 Spin Miniprep plasmid kit as instructed (Qiagen; Germantown, MD), and verified by Sanger  
189 automated sequencing (ACGT; Germantown, MD). pENTR/D-TOPO insert DNA was transferred  
190 to a pET-DEST42 destination plasmid and used to transform *E. coli* BL21 Star (DE3) for  
191 expression using a Gateway LR Clonase II enzyme mix, as instructed by the manufacturer  
192 (Thermo Fisher). Positive clones were identified by PCR screening, and plasmid content was  
193 verified by Sanger automated sequencing, as above.

#### 194 **Bioinformatic analysis**

195 In order to determine those conditions that may regulate expression of BARBAKC583\_1133, we  
196 analyzed *B. bacilliformis* whole transcriptome data [11] obtained from the Sequencing Read  
197 Archive database (accession number PRJNA647605) using DESeq2 software [12]. For the  
198 DESeq2 analysis, the p-value distribution of differentially expressed genes was re-calculated  
199 using the fdrtool package [13]. The resulting data more accurately reflected the desired null  
200 distribution of p-values and effectively made the analysis more stringent. TPM calculations were  
201 made using a python script located in a github repository  
202 ([https://github.com/shawachter/TPM\\_Scripts](https://github.com/shawachter/TPM_Scripts)).

#### 203 **Software, graphics and statistics**

204 The domains of FhbpA (ABM44634.1; BARBAKC583\_1133 locus) were predicted using SignalP  
205 4.1 [14] and SMART [15] for the secretory signal sequence, JPred4 [16] for a potential helical  
206 linker, and PROSITE-Expasy [17], BLAST [18] and SMART [15] for autotransporter (beta) and  
207 passenger domains. Structure predictions for FhbpA were modeled using Phyre2 [19].  
208 Statistical analyses were done using Prism 9.0 software (GraphPad, La Jolla, CA) and student's  
209 t-tests, where p values < 0.05 were considered significant. Phylogenetic analyses and trees



210 were prepared using Mega 7.0 software [20]. Other figures and graphs were generated using  
211 PowerPoint and Excel software (Microsoft, Redmond, WA), respectively.

## 212 **Results**

### 213 **Serum complement resistance of *B. bacilliformis* and involvement of factor H**

214 The *B. bacilliformis* life cycle revolves around intracellular infection of human erythrocytes and  
215 vascular endothelial cells [21-23]. As such, complement imposes a persistent selective  
216 pressure, especially when the pathogen is extracellular. We were therefore curious about the  
217 serum-resistance of *B. bacilliformis*. To examine this phenotype, standard serum assays were  
218 done using commercially-available human serum components, while tailoring the assay for  
219 *Bartonella* (e.g., using HIB as a diluent). Results of the serum resistance assays showed that *B.*  
220 *bacilliformis* had a  $63.3 \pm 4.8\%$  survival rate in human serum complement (HSC) at a 50%  
221 concentration, relative to untreated controls (**Fig. 1**). While this is a significant reduction  
222 compared to untreated controls ( $p < 0.05$ ), the results suggest that *B. bacilliformis* is decidedly  
223 resistant to complement. If human serum complement was inactivated at  $56^{\circ}\text{C}$  for 30 min (iHSC)  
224 and then used in assays at a 50% concentration, the percent survival was decreased to  $80 \pm$   
225  $6.5\%$ ; a value that was not significantly different from the untreated controls, and implicated  
226 complement as the major bactericidal factor present in human serum (**Fig. 1**).

227 To examine the role of factor H in conferring serum resistance to *B. bacilliformis*, assays  
228 were also done using human factor H-depleted serum (FHDS) at a 50% final concentration.  
229 Results of the FHDS assays showed a significant decrease in percent survival ( $-14.3\%$ ;  $p < 0.05$ )  
230 compared to the HSC-treated bacteria, suggesting that serum factor H is used by *B.*  
231 *bacilliformis* to protect against complement activation via the alternative pathway (**Fig. 1**).  
232 Incomplete abrogation of resistance in the absence of factor H suggests that other types of  
233 complement resistance factors are employed by *B. bacilliformis*.

234

235 **Fig. 1. *B. bacilliformis* complement resistance and involvement of factor H.** *B. bacilliformis*  
236 (strain KC583) had a mean survival rate of  $63.3 \pm 4.8\%$  after a 1h incubation in pooled human  
237 serum complement (HSC, 50% concentration) vs. untreated controls. *B. bacilliformis* displayed  
238 a significantly lower survival rate ( $49 \pm 2.7\%$ ) after a 1h incubation in factor H-depleted human  
239 serum (FHDS, 50% concentration) vs. those treated with HSC. The percent survival of  
240 untreated bacteria (None) and those treated with heat-inactivated human serum complement  
241 (iHSC) at a 50% concentration was not significantly different. Values represent the means of 4  
242 independent serum assays  $\pm$  SEM. Asterisks denote significant differences ( $p < 0.05$ ) by  
243 unpaired student's t tests.

#### 244 **Factor H binding to *B. bacilliformis* cells and proteins**

245 Since factor H can bind to the surface of certain pathogenic bacteria and provides protection  
246 from complement, we tested for factor H binding to fixed, intact *B. bacilliformis* cells by imaging  
247 with immunofluorescence microscopy. Results of these experiments clearly showed a  
248 consistent and markedly greater intensity of fluorescence in bacteria probed with pooled HSC  
249 followed by goat anti-human factor H antiserum (**Fig. 2A**) relative to bacteria treated with  
250 pooled, naive goat serum or PBS in place of the factor H antiserum (**Figs. 2B, 2C**). These data  
251 suggest that factor H binds to the surface of intact *B. bacilliformis* cells.

252 **Fig. 2. Human factor H binding to intact *B. bacilliformis* cells as demonstrated by**  
253 **immunofluorescence microscopy.** Bacterial cultures were harvested at mid-log phase, fixed  
254 in paraformaldehyde, and quenched with glycine. Following three washes in PBS-T (PBS +  
255 0.05% Tween 20), cells were incubated with pooled HSC for 30 min and washed 3 times in  
256 PBS-TDS (PBS-T + 5% pooled donkey serum). Mixtures were then incubated for 1 h with either:  
257 **A)** goat anti-human factor H antiserum, **B)** pooled goat serum, or **C)** PBS (pH 7.4). After 3  
258 washes in PBS-TDS, factor H binding was visualized with AlexaFluor 488-conjugated donkey  
259 anti-goat IgG and fluorescence microscopy.

260 **Identity, phylogeny, and predicted structure of a factor H-binding protein of *B.***

261 ***bacilliformis***

262 To discover the surface-exposed, factor H-binding proteins (Fhbp's) of *B. bacilliformis*, total  
263 membranes were purified from the bacterium, as we previously described [9]. The membrane-  
264 associated proteins were subsequently resolved by SDS-PAGE and blotted to nitrocellulose.  
265 The resulting blots were probed with human factor H to identify the membrane-associated  
266 Fhbp's. FW blots consistently identified four prominent Fhbp's of approximately 131, 119, 60  
267 and 43 kDa that were enriched in the membrane fraction of the bacterium (**Fig. 3B, lane 2**). Of  
268 these, only the ~60-kDa protein was detected in both the total cell lysate and membrane  
269 fractions of *B. bacilliformis*. Protein bands corresponding to the ~131-kDa and ~119-kDa  
270 polypeptides were submitted to Alphalyse, Inc., for analysis by MALDI-TOF/TOF mass  
271 spectrometry (MS). MS identified the ~119-kDa polypeptide band as ABM44634 (GenBank); a  
272 protein annotated as an outer membrane autotransporter. This protein was subsequently  
273 designated factor H-binding protein A (FhbpA).

274 **Fig. 3. Four membrane-associated *B. bacilliformis* proteins bind human serum factor H.**

275 **A)** Coomassie blue-stained SDS-PAGE gel (4-20% w/v acrylamide gradient), containing: MW,  
276 protein molecular weight standards; lane 1, *B. bacilliformis* whole-cell lysate, and lane 2, a *B.*  
277 *bacilliformis* membrane preparation. **B)** Corresponding FW blot probed successively with:  
278 human factor H, mouse anti-human factor H antibody, and rabbit anti-mouse IgG::HRP. Four  
279 prominent *B. bacilliformis* factor-H binding proteins (Fhbp's) of ~131, 119, 60 and 43 kDa were  
280 enriched and identified in the membrane preparation (lane 2). The ~119-kDa FhbpA protein  
281 band is arrowed. Molecular weights from protein standards in MW are shown to the left in kDa.

282 The predicted 1,058 amino acid sequence of FhbpA was used in BLAST searches to help  
283 elucidate the protein's function and phylogeny. While the results of the searches strongly

284 suggested that FhbpA was an autotransporter protein, use of the entire sequence as a search  
285 query resulted in homology mapping primarily to the protein's predicted secretory signal  
286 sequence and/or autotransporter beta barrel domains (data not shown). We therefore confined  
287 the BLASTP search to the 720-residue, predicted passenger domain of FhbpA (amino acids 26-  
288 745) as the search query, since this is typically the "functional", transported portion of  
289 autotransporter proteins. Results of this analysis showed that the twelve homologs with the  
290 highest total scores were all predicted autotransporter proteins of *Bartonella*, with passenger  
291 domains of *Bartonella schoenbuchensis* autotransporters most closely-related to that of FhbpA  
292 **(Fig. 4).**

293 **Fig. 4. Phylogenetic analysis.** Neighbor-joining tree drawn to scale for the twelve BLASTP hits  
294 with the highest total scores from other bacteria, using the predicted passenger domain of *B.*  
295 *bacilliformis* FhbpA (ABM44634.1; residues 26-745) as a search query. All homologs identified  
296 were predicted autotransporter proteins. Phylogenies were computed using the Poisson  
297 correction method. Bootstrap values (1,000 replicates) are shown at the nodes. Abbreviations:  
298 Ba, *B. ancashensis*; Bb, *B. bacilliformis*; Bbo, *B. bovis*; Bh, *B. henselae*; Bs, *B.*  
299 *schoenbuchensis*; and B sp. WD12.1, an undescribed *Bartonella* species.

300 Structure predictions of FhbpA were also done *in silico* using several programs available  
301 online (see Materials and methods). From these results, we determined the overall arrangement  
302 of the FhbpA protein precursor (**Fig. 5A**). The immature protein includes a 25-amino acid signal  
303 sequence, a 720-residue passenger domain, a 23-residue helical linker, a 9-residue spacer, the  
304 268-residue autotransporter domain, and a 13-amino acid tail with a carboxy-terminal  
305 phenylalanine residue. FhbpA's predicted passenger and autotransporter domains were also  
306 analyzed and modeled using Phyre2 [19]. These results showed that 430 residues (~60% of the  
307 predicted passenger domain) could be modeled with 99.7% confidence by the *Bordetella*

308 *pertussis* virulence factor p.69 pertactin (**Fig. 5B**). In addition, 239 residues of FhbpA (89% of  
309 the predicted autotransporter domain) could be modeled with 100.0% confidence by the pre-  
310 cleavage structure of the EspP autotransporter serine protease of *E. coli* O157:H7 (**Fig. 5C**).

311 **Fig. 5. Structure predictions for FhbpA. A)** Linear arrangement of the FhbpA precursor,  
312 including a 25-amino acid (aa) signal peptide (red), 720-aa passenger domain (PD, green), 23-  
313 aa linker (blue), 9-aa spacer, 268-aa autotransporter domain (AT, yellow) and a 13-aa tail. **B)**  
314 FhbpA passenger domain structure prediction by Phyre2 [19]. 430 residues (~60% of the  
315 predicted domain) were modeled with 99.7% confidence by the single highest-scoring template;  
316 the *Bordetella pertussis* virulence factor p.69 pertactin. **C)** FhbpA autotransporter domain  
317 structure prediction by Phyre2 [19]. 239 residues (~89% of the predicted domain) were modeled  
318 with 100.0% confidence by the single highest-scoring template; the pre-cleavage structure of  
319 the *E. coli* O157:H7 autotransporter serine protease, EspP.

## 320 **Identification of the factor H-binding domain of FhbpA**

321 Passenger domains of several autotransporter proteins are involved in binding various host  
322 proteins, including serum factor H and extracellular matrix proteins (e.g., fibronectin and  
323 laminin). We therefore hypothesized that FhbpA's factor H-binding activity likely involved its  
324 passenger domain. To address the hypothesis, we prepared FW blots with soluble and insoluble  
325 fractions of *E. coli* strains (see **S1 Table** for details) ectopically expressing either FhbpA's  
326 autotransporter domain (strain LDH444) or passenger domain (strain LDH555). An *E. coli* strain  
327 expressing recombinant *B. bacilliformis* GroES (strain LDH333) was used as a negative control.  
328 FW blots probed with a Nickel-HRP probe for the His<sub>6</sub> tag of each fusion protein detected three  
329 recombinant proteins (**Fig. 6B**), including the ~15.8-kDa GroES band and autotransporter bands  
330 of ~37-kDa (major) and ~35.2-kDa (minor) (predicted molecular mass of ~31.1 kDa) in the  
331 insoluble fractions of LDH333 and LDH444, respectively (**Fig. 6B; lanes 2 and 4**). Surprisingly,

332 passenger domain protein bands of approximately 82.2, 70, 63.5, 45.7, and 31.9 kDa were all  
333 detected by the nickel-HRP probe in the insoluble fraction of strain LDH555 (**Fig. 6B; lane 6**).  
334 Protein bands of the same molecular weight could also be seen in the Coomassie blue-stained  
335 gel of strain LDH555 (**Fig. 6A; lane 6**). The 82.2-kDa protein band is presumably the full-length  
336 FhbpA passenger domain, with a predicted molecular mass of ~82.8 kDa, whereas the proteins  
337 of lower molecular weight are possibly partial-proteolysis fragments with intact His<sub>6</sub> tags on their  
338 C termini that are recognized and bound by the nickel-HRP probe.

339 Identical FW blots were also prepared and probed with human factor H and anti-factor H  
340 antibodies. These blots showed that factor H bound to three unrelated *E. coli* proteins of  
341 approximately 43.6, 20 and 16 kDa (**Fig. 6C**, lanes 1,2,4 and 6) plus the five FhbpA passenger  
342 domain protein bands identified in **Fig. 6B** (lane 6; starred bands). In contrast, a recombinant *B.*  
343 *bacilliformis* GroES control expressed from the same vector (pET-DEST42) or FhbpA's  
344 autotransporter domain (**Fig 6C, lanes 2 and 4**, respectively), did not bind detectable amounts  
345 of factor H. These results strongly suggest that the passenger domain of FhbpA is responsible  
346 for binding factor H.

347  
348 **Fig. 6. The FhbpA passenger domain binds factor H. A)** SDS-PAGE gel (10-20% acrylamide  
349 gradient) stained with Coomassie brilliant blue R (30 µg protein per lane). **Lanes:** 1 and 2  
350 soluble and insoluble fractions of *E. coli* LDH333 (GroES), respectively; 3 and 4, soluble and  
351 insoluble fractions of *E. coli* LDH444 (recombinant autotransporter domain), respectively; 5 and  
352 6, soluble and insoluble fractions of *E. coli* LDH555 (recombinant passenger domain),  
353 respectively. **B)** Corresponding far-western (FW) blot probed with a Nickel-HRP probe for the  
354 His<sub>6</sub> tag on recombinant proteins. **C)** Corresponding FW blot probed with human factor H.  
355 Passenger domain protein fragments recognized in both FW blots and the stained gel are

356 indicated by stars. Recombinant GroES is arrowed. Molecular weight values from standards are  
357 given to the left in kDa.

358

359 **Differential expression of *fhbpA* in response to biologically-relevant environmental**  
360 **conditions and infection of human cells**

361 *B. bacilliformis* must adapt to markedly different environments imposed by the sand fly vector  
362 and human host in order to survive. In consideration of the factor H-binding activity of FhbpA,  
363 we hypothesized that *fhbpA* gene expression would be greater under “human-like” versus “sand  
364 fly-like” conditions. To address the hypothesis, we analyzed *fhbpA* expression in response to  
365 temperature and pH shifts from the normal cultivation temperature of 30°C and pH of 7.4 to  
366 simulate what occurs during transmission between the insect vector and human host. In  
367 addition, we examined expression during infection of fresh human blood and low-passage,  
368 cultured HUVECs. Results of the RNA-Seq transcriptomic analyses with average *fhbpA*  
369 transcripts per million (TPM) are provided in **Table 1**. These results clearly showed enhanced  
370 expression of *fhbpA* under conditions that simulated the human host (PI37, PIBG) or during  
371 infection of human blood or vascular endothelial cells (HB37, HBBG, HUVE). The greatest  
372 levels of *fhbpA* expression were observed in *B. bacilliformis* RNA samples from infection of  
373 HUVEC (HUVE) cells, with an average TPM of 3438 ± 434. In fact, this level of expression was  
374 significantly higher relative to all other conditions when analyzed by DESeq2.

375 **Table 1. Differential expression of *fhbpA* in response environmental conditions. *B.***  
376 *bacilliformis* cultures (mid-log-phase) were shifted from typical *in vitro* growth conditions to those  
377 indicated for 2h, or 24h for HUVEC (HUVE) infections, as described previously [11], then used  
378 as source of RNA. Average *fhbpA* transcripts per million (TPM) were determined by RNA-Seq.

| Conditions | Medium | Designation | Simulation | Ave. TPM ± SEM (N) <sup>b</sup> |
|------------|--------|-------------|------------|---------------------------------|
|------------|--------|-------------|------------|---------------------------------|

|                                                |                                 |      |                                                   |                  |
|------------------------------------------------|---------------------------------|------|---------------------------------------------------|------------------|
| pH 7.4,<br>25°C                                | HIBB plates                     | PI25 | Sand fly ambient temperature                      | 106.5 ± 8.5 (2)  |
| pH 7.4,<br>30°C                                | HIBB plates                     | PI30 | Sand fly ambient temperature                      | 176.5 ± 32.5 (2) |
| pH 7.4,<br>37°C                                | HIBB plates                     | PI37 | Human host                                        | 271.5 ± 17.5 (2) |
| pH 7.4,<br>37°C with<br>blood gas <sup>a</sup> | HIBB plates                     | PIBG | Human host                                        | 364.7 ± 16.1 (3) |
| pH 6.0,<br>30°C                                | HIBB liquid                     | pH06 | Sand fly post-blood meal                          | 109 ± 2 (2)      |
| pH 7.4,<br>30°C                                | HIBB liquid                     | pH07 | Human host / sand fly blood<br>meal mid-digestion | 64 ± 5 (2)       |
| pH 8.2,<br>30°C                                | HIBB liquid                     | pH08 | Sand fly initial blood meal                       | 69 ± 5 (2)       |
| pH 7.4,<br>37°C with<br>blood gas              | HUVECs in<br>EGM-Plus<br>medium | HUVE | Human endothelial cell infection                  | 3,438 ± 434 (2)  |
| pH 7.4,<br>37°C                                | Human<br>blood                  | HB37 | Human erythrocyte infection                       | 184.7 ± 14.8 (3) |
| pH 7.4,<br>37°C with<br>blood gas              | Human<br>blood                  | HBBG | Human erythrocyte infection                       | 223.3 ± 29.5 (3) |

379 HIBB, Bacto heart infusion blood agar containing 4% defibrinated sheep blood and 2% sheep serum  
380 (vol/vol); HUVECs, human umbilical vein endothelial cells; EGM-Plus (Lonza), endothelial cell growth  
381 medium containing 2% fetal bovine serum and bovine brain extract.

382 <sup>a</sup> Blood gas consists of 5% CO<sub>2</sub>, 2.5% O<sub>2</sub>, and 92.5% N<sub>2</sub> at 100% humidity to simulate human blood.

383 <sup>b</sup> N = number of cDNA libraries constructed and analyzed by RNA-Seq per given condition (biological  
384 replicates).

385

## 386 Discussion

387 Complement is a cornerstone of humoral innate immunity in vertebrates, as it provides a first  
388 line of defense and persistent immune pressure on pathogens. However, despite *Bartonella's*  
389 specialized niche within the mammalian circulatory system, only one study, to date, has



390 examined complement resistance in these bacteria. In that study, Deng et al. correlated  
391 resistance of *B. birtlesii* to the presence of the BadA trimeric autotransporter adhesin by  
392 demonstrating that sensitivity to complement was significantly increased in a *badA*-knockout  
393 strain [24]. In addition, supernatants from wild-type *B. birtlesii* liquid cultures possessed anti-  
394 complement activity that could be neutralized by anti-BadA antibodies [24]. In the present study,  
395 we describe the complement-resistance phenotype of *B. bacilliformis* with identification and  
396 characterization of a serum factor H-binding protein, FhbpA. Interestingly, both this study and  
397 the previous report [24] ultimately implicated an autotransporter protein in the complement-  
398 resistance phenotype of *Bartonella*. In keeping with these results, previous reports by others  
399 have shown that complement resistance can be conferred by surface-exposed, autotransporter  
400 proteins of several bacterial pathogens, including the OmpB of *Rickettsia conorii* [5], YadA of  
401 *Yersinia enterocolitica* [4, 25], Vag8 and BrkA of *Bordetella pertussis* [7, 26], UspA2 of  
402 *Moraxella catarrhalis* [27] and DsrA of *Haemophilus ducreyi* [28, 29].

403 Autotransporters comprise a large family of outer membrane proteins in Gram-negative  
404 bacteria that are involved in virulence. The term “autotransporter” refers to the ability of these  
405 proteins to “independently” translocate to the outer membrane via type V secretion, as a result  
406 of three conserved domains in a single polypeptide chain, including a N-terminal secretory  
407 signal peptide for Sec translocon-dependent export across the cytosolic membrane, a C-  
408 terminal autotransporter domain, and a passenger domain that is exported to the cell surface  
409 through a 12-stranded trans-membrane beta barrel formed by the autotransporter domain  
410 (reviewed in [30]; see **Fig. 5**). The domain configuration of FhbpA, together with its Phyre2  
411 structure predictions, suggest that the protein is a type Va or “classical” autotransporter, as  
412 exemplified by the IgA1 protease of *Neisseria gonorrhoeae* [31], the pertactin adhesin of  
413 *Bordetella pertussis* [32], and the AIDA-I adhesin of *Escherichia coli* [33]. Our data also suggest  
414 that the passenger domain remains associated with the bacterial outer membrane following its  
415 secretion (**Fig. 3B**). Moreover, the conserved proteolytic cleavage site between adjacent Arg-

416 Arg residues in the linker regions of secreted serine protease autotransporters [34] is absent in  
417 FhbpA's linker region (see **Fig. 5**). Nevertheless, the possibility exists that some FhbpA  
418 passenger domain may be cleaved and released to the medium, as was observed with BadA  
419 during growth of *B. birtlesii* in liquid culture [24].

420 Passenger domains that are not cleaved following export by type Va autotransporters often  
421 serve as adhesins for host extracellular matrix proteins and cells [32,33,35]. Thus, our mapping  
422 of factor H-binding activity to the passenger domain of FhbpA (**Fig. 6**) was not surprising.  
423 Although FhbpA was not tested for binding to other host proteins, we would not be surprised if  
424 the protein was promiscuous regarding host substrate(s), as previously reported for  
425 autotransporters from other pathogens that confer serum resistance [4,5,25,27,29].

426 Molecular Koch's postulates require that a potential virulence factor be mutagenized in order  
427 to gauge the effect of the mutation and to evaluate the determinant's role in pathogenesis [36].  
428 To this end, we made several attempts to mutagenize *fhbpA* using various suicide vector  
429 constructs and our standard protocol for genetic manipulation of *B. bacilliformis* [37]. However,  
430 these attempts were unsuccessful, suggesting that the *fhbpA* locus may be essential for  
431 viability. In certain respects this result was puzzling, as the complement-resistance phenotype of  
432 *B. bacilliformis* in the absence of factor H was considerable (~49% survival; **Fig. 1**), suggesting  
433 that binding of factor H by FhbpA was not essential, and/or the bacterium was protected from  
434 complement by mechanisms that didn't involve factor H. Perhaps additional, undescribed  
435 function(s) of FhbpA are essential to viability and precluded mutagenesis. Although not directly  
436 demonstrated in this study, we predict that FhbpA provides protection against complement to *B.*  
437 *bacilliformis* by virtue of the ability of bound host factor H to: a) directly bind and neutralize C3b,  
438 b) serve as a co-factor for factor I-mediated proteolysis of C3b, and c) accelerate the decay of  
439 C3 convertase in the alternative pathway [38].

440 The widespread occurrence of conserved FhbpA-like passenger domains in the  
441 autotransporter proteins of several *Bartonella* species (**Fig. 4**) suggests that binding of serum

442 factor H may be a conserved strategy to enhance complement resistance during infection of  
443 various mammalian hosts by members of the genus. *B. schoenbuchensis*, the species with the  
444 highest total score in BLASTP searches with the FhbpA passenger domain (**Fig. 4**), can cause  
445 bacteremia in ruminants and is possibly transmitted to humans through the bite of infected deer  
446 keds [39]. Two other high-scoring hits included the FhbpA-like passenger domains from  
447 autotransporters of *B. henselae* and *B. ancashensis*; both recognized human pathogens [1,40].

448 Transcriptomic analyses of *fhbpA* expression by RNA-Seq suggest that *fhbpA* is an  
449 “infection-specific” gene that is upregulated in response to environmental cues within the human  
450 host, including a temperature of 37°C, blood gas (5% CO<sub>2</sub>, 2.5% O<sub>2</sub> and 92.5% N<sub>2</sub> at 100%  
451 relative humidity) and the appropriate host cells to parasitize (i.e., vascular endothelial cells and  
452 erythrocytes) (**Table 1**). Considering the factor H-binding activity of FhbpA, these transcriptomic  
453 results are not surprising, since factor H and complement are unique to vertebrates and would  
454 only be present in the insect immediately following a blood meal. Nevertheless, it is conceivable  
455 that mature FhbpA could play undescribed accessory roles, such as an adhesin, in the context  
456 of the sand fly vector [41].

457 In summary, we have identified four factor H-binding proteins in the membrane fraction of *B.*  
458 *bacilliformis*. One of these was determined to be an autotransporter protein (ABM44634.1) by  
459 mass spectrometry, with binding activity conferred by its membrane-associated passenger  
460 domain. Widespread occurrence of FhbpA-like passenger domains in other *Bartonella*  
461 autotransporters suggests that conserved complement-resistance strategies are employed by  
462 the genus. Finally, expression analysis suggests that *fhbpA* expression is upregulated during  
463 infection of the human host, especially during the pathogen’s association with vascular  
464 endothelial cells.

## 465 **Acknowledgments**

466 We are sincerely grateful to Dr. Rich Marconi and Nathaniel O'Bier for technical assistance with  
467 FW blots.

468

## 469 Author Contributions

470 Conceived and designed the experiments: LH, SW, MM. Performed the experiments: LH, BM,  
471 SW, PG, MD, KS. Analyzed the data: LH, BM, SW, MM. Wrote the paper: MM, SW.

472

## 473 References

- 474 1. Minnick MF, Anderson BE. *Bartonella*. In: Tang Y-W, Sails A, editors. Molecular Medical  
475 Microbiology 2<sup>nd</sup> Edition. London: Academic Press; 2014. Chapter 105. p. 1911-1939.
- 476 2. Russo TA, Beanan JM, Olson R, MacDonald U, Cox AD, St Michael F, et al. The K1 capsular  
477 polysaccharide from *Acinetobacter baumannii* is a potential therapeutic target via  
478 passive immunization. *Infect Immun*. 2013; 81:915-22.
- 479 3. Schiller NL, Joiner KA. Interaction of complement with serum-sensitive and serum-resistant  
480 strains of *Pseudomonas aeruginosa*. *Infect. Immun*. 1986; 54:689–694.
- 481 4. Biedzka-Sarek M, Salmenlinna S, Gruber M, Lupas AN, Meri S, Skurnik M. Functional  
482 mapping of YadA- and Ail-mediated binding of human factor H to *Yersinia enterocolitica*  
483 serotype O:3. *Infect Immun*. 2008; 76(11):5016-27.
- 484 5. Riley SP, Patterson JL, Martinez JJ. The rickettsial OmpB  $\beta$ -peptide of *Rickettsia conorii* is  
485 sufficient to facilitate factor H-mediated serum resistance. *Infect Immun*. 2012; 80:2735-  
486 43.
- 487 6. Abdullah M, Nepluev I, Afonina G, Ram S, Rice P, Cade W, et al. Killing of *dsrA* mutants of  
488 *Haemophilus ducreyi* by normal human serum occurs via the classical complement  
489 pathway and is initiated by immunoglobulin M binding. *Infect. Immun*. 2005; 73:3431-9.
- 490 7. Marr N, Shah NR, Lee R, Kim EJ, Fernandez RC. *Bordetella pertussis* autotransporter Vag8  
491 binds human C1 esterase inhibitor and confers serum resistance. *PLoS One*. 2011;  
492 6:e20585.
- 493 8. Berggård K, Lindahl G, Dahlbäck B, Blom AM. *Bordetella pertussis* binds to human C4b-  
494 binding protein (C4BP) at a site similar to that used by the natural ligand C4b. *Eur J*  
495 *Immunol*. 2001; 31:2771-80.
- 496 9. Minnick MF. Identification of outer membrane proteins of *Bartonella bacilliformis*. *Infect*  
497 *Immun*. 1994; 62:2644-8.

- 498 10. Towbin H, Staehelin T, Gordon J. Electrophoretic transfer of proteins from polyacrylamide  
499 gels to nitrocellulose sheets: procedure and some applications. Proc Natl Acad Sci U S  
500 A. 1979; 76:4350-4.
- 501 11. Wachter S, Hicks LD, Raghavan R, Minnick MF. Novel small RNAs expressed by *Bartonella*  
502 *bacilliformis* under multiple conditions reveal potential mechanisms for persistence in the  
503 sand fly vector and human host. PLoS Negl Trop Dis. 2020 Nov 20; 14(11):e0008671.
- 504 12. Love MI, Huber W, Anders S. Moderated estimation of fold change and dispersion for RNA-  
505 seq data with DESeq2. Genome Biol. 2014;15(12):550.
- 506 13. Strimmer K. fdrtool: a versatile R package for estimating local and tail area-based false  
507 discovery rates. Bioinformatics. 2008;24(12):1461–2.
- 508 14. Petersen TN, Brunak S, von Heijne G, Nielsen H. SignalP 4.0: discriminating signal peptides  
509 from transmembrane regions Nature Methods. 2011; 8:785-786.
- 510 15. Letunic I, Bork P. 20 years of the SMART protein domain annotation resource, Nucleic Acids  
511 Res. 2018; 46:D493-D496.
- 512 16. Drozdetskiy A, Cole C, Procter J, Barton GJ. JPred4: a protein secondary structure  
513 prediction server. Nucleic Acids Res. 2015 Jul 1; 43(W1):W389-94.
- 514 17. Sigrist, CJA, Cerutti L, Hulo N, Gattiker A, Falquet L, Pagni M, et al. PROSITE: a  
515 documented database using patterns and profiles as motif descriptors. Brief Bioinform.  
516 2002 Sep; 3:265-74.
- 517 18. Altschul SF, Gish W, Miller W, Myers EW, Lipman DJ. Basic local alignment search tool. J  
518 Mol Biol. 1990 Oct 5; 215(3):403-10.
- 519 19. Kelley LA, Mezulis S, Yates CM, Wass MN, Sternberg MJ. The Phyre2 web portal for  
520 protein modeling, prediction and analysis. Nat Protoc. 2015; 10:845-858.
- 521 20. Kumar S, Stecher G, Tamura K. MEGA7: Molecular Evolutionary Genetics Analysis Version  
522 7.0 for Bigger Datasets. Mol Biol Evol. 2016 Jul; 33(7):1870-4.
- 523 21. Reynafarje C, Ramos J. The hemolytic anemia of human bartonellosis. Blood. 1961; 17:562-  
524 78.
- 525 22. Benson LA, Kar S, McLaughlin G, Ihler GM. Entry of *Bartonella bacilliformis* into erythrocytes.  
526 Infect Immun. 1986; 54:347-53.
- 527 23. Hill EM, Raji A, Valenzuela MS, Garcia F, Hoover R. Adhesion to and invasion of cultured  
528 human cells by *Bartonella bacilliformis*. Infect Immun. 1992; 60:4051-8.
- 529 24. Deng H, Le Rhun D, Buffet JP, Cotté V, Read A, Birtles RJ, et al. Strategies of exploitation  
530 of mammalian reservoirs by *Bartonella* species. Vet Res. 2012 Feb 27; 43(1):15.
- 531 25. Kirjavainen V, Jarva H, Biedzka-Sarek M, Blom AM, Skurnik M, Meri S. *Yersinia*  
532 *enterocolitica* serum resistance proteins YadA and ail bind the complement regulator  
533 C4b binding protein. PLoS Pathog. 2008; 4(8):e1000140
- 534 26. Fernandez RC, Weiss AA. Cloning and sequencing of a *Bordetella pertussis* serum  
535 resistance locus. Infect Immun. 1994; 62:4727-38.

- 536 27. Singh B, Al-Jubair T, Voraganti C, Andersson T, Mukherjee O, Su YC, et al. *Moraxella*  
537 *catarrhalis* binds plasminogen to evade host innate immunity. *Infect Immun.* 2015;  
538 83(9):3458-69.
- 539 28. Elkins C, Morrow KJ Jr, Olsen B. Serum resistance in *Haemophilus ducreyi* requires outer  
540 membrane protein DsrA. *Infect Immun.* 2000 Mar;68(3):1608-19..
- 541 29. Leduc I, Olsen B, Elkins C. Localization of the domains of the *Haemophilus ducreyi* trimeric  
542 autotransporter DsrA involved in serum resistance and binding to the extracellular matrix  
543 proteins fibronectin and vitronectin. *Infect. Immun.* 2009; 77:657–666.
- 544 30. Fan E, Chauhan N, Udatha DBRKG, Leo JC, Linke D. Type V Secretion Systems in  
545 Bacteria. *Microbiol Spectr.* 2016 Feb;4(1).
- 546 31. Pohlner J, Halter R, Beyreuther K, Meyer TF. Gene structure and extracellular secretion of  
547 *Neisseria gonorrhoeae* IgA protease. *Nature.* 1987 Jan 29-Feb 4;325(6103):458-62.
- 548 32. Leininger E, Roberts M, Kenimer JG, Charles IG, Fairweather N, Novotny P, Brennan MJ.  
549 Pertactin, an Arg-Gly-Asp-containing *Bordetella pertussis* surface protein that promotes  
550 adherence of mammalian cells. *Proc Natl Acad Sci U S A.* 1991 Jan 15;88(2):345-9.
- 551 33. Benz I, Schmidt MA. Cloning and expression of an adhesin (AIDA-I) involved in diffuse  
552 adherence of enteropathogenic *Escherichia coli*. *Infect Immun.* 1989; 57:1506-11.
- 553 34. Yen YT, Kostakioti M, Henderson IR, Stathopoulos C. Common themes and variations in  
554 serine protease autotransporters. *Trends Microbiol.* 2008 Aug;16(8):370-9.
- 555 35. Leo JC, Grin I, Linke D. Type V secretion: mechanism(s) of autotransport through the  
556 bacterial outer membrane. *Philos Trans R Soc Lond B Biol Sci.* 2012 Apr  
557 19;367(1592):1088-101.
- 558 36. Falkow S. Molecular Koch's postulates applied to microbial pathogenicity. *Rev Infect Dis.*  
559 1988 Jul-Aug;10 Suppl 2:S274-6.
- 560 37. Battisti JM, Minnick MF. Development of a system for genetic manipulation of *Bartonella*  
561 *bacilliformis*. *Appl Environ Microbiol.* 1999 Aug;65(8):3441-8.
- 562 38. Rodríguez de Córdoba S, Esparza-Gordillo J, Goicoechea de Jorge E, Lopez-Trascasa M,  
563 Sánchez-Corral P. The human complement factor H: functional roles, genetic variations  
564 and disease associations. *Mol Immunol.* 2004 Jun;41(4):355-67.
- 565 39. Dehio C, Sauder U, Hiestand R. Isolation of *Bartonella schoenbuchensis* from *Lipoptena*  
566 *cervi*, a blood-sucking arthropod causing deer ked dermatitis. *J Clin Microbiol.* 2004  
567 Nov;42(11):5320-3.
- 568 40. Mullins KE, Hang J, Jiang J, Leguia M, Kasper MR, Ventosilla P, Maguiña C, Jarman RG,  
569 Blazes D, Richards AL. Description of *Bartonella ancashensis* sp. nov., isolated from the  
570 blood of two patients with verruga peruana. *Int J Syst Evol Microbiol.* 2015  
571 Oct;65(10):3339-43.

572 41. Battisti JM, Lawyer PG, Minnick MF. Colonization of *Lutzomyia verrucarum* and *Lutzomyia*  
573 *longipalpis* sand flies (Diptera: Psychodidae) by *Bartonella bacilliformis*, the etiologic  
574 agent of Carrión's disease. PLoS Negl Trop Dis. 2015 Oct 5;9(10):e0004128

575

576

577

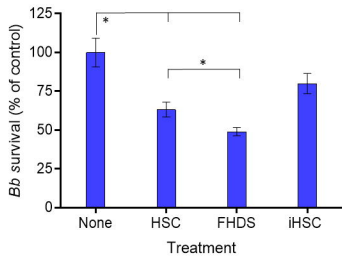



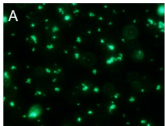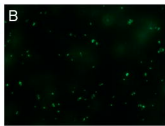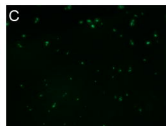

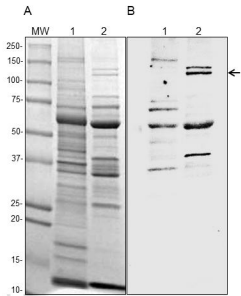

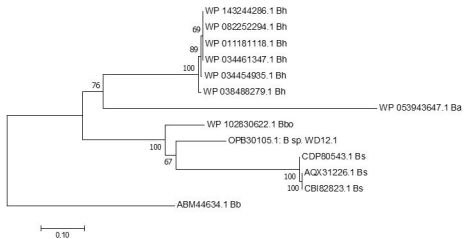

A

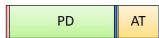

100 aa

B

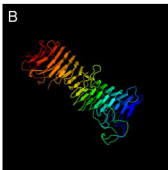

C

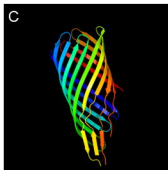

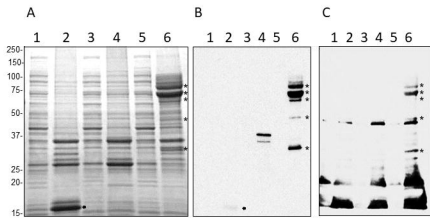

Source: https://www.biorxiv.org/content/10.1101/2021.04.13.439661v1.full.pdf
